# Supplementary material for: Dehydrogenation of propane over high silica *BEA type gallosilicate (Ga-Beta)
Source: Royal Society of Chemistry journal article supplement (doi:10.1039/c9cy00691e), 2019-01-01
Supplement: c9cy00691e1.pdf [file c9cy00691e1.pdf]

## Supporting Information

### Dehydrogenation of propane over high silica \*BEA type gallosilicate (Ga-Beta)

Masahiro Nakai,<sup>[a]</sup> Koji Miyake,<sup>[b]\*</sup> Reina Inoue,<sup>[a]</sup> Kaito Ono,<sup>[a]</sup> Hasna Al Jabri,<sup>[a]</sup> Yuichiro Hirota,<sup>[a]</sup> Yoshiaki Uchida,<sup>[a]</sup> Shunsuke Tanaka,<sup>[c]</sup> Manabu Miyamoto,<sup>[d]</sup> Yasunori Oumi,<sup>[e]</sup> Chang Yi Kong<sup>[b]</sup> and Norikazu Nishiyama<sup>[a]</sup>

a) Division of Chemical Engineering, Graduate School of Engineering Science, Osaka University, 1-3 Machikaneyama, Toyonaka, Osaka 560-8531, Japan. E-mail: [\\*m-nakai@cheng.es.osaka-u.ac.jp](mailto:m-nakai@cheng.es.osaka-u.ac.jp)

b) Department of Applied Chemistry and Biochemical Engineering, Faculty of Engineering, Shizuoka University, 3-5-1 Johoku Naka-ku Hamamatsu, 432-8561, Japan E-mail: [miyake.koji@shizuoka.ac.jp](mailto:miyake.koji@shizuoka.ac.jp)

c) Department of Chemical, Energy and Environmental Engineering, Faculty of Environmental and Urban Engineering, Kansai University, 3-3-35 Yamate-cho, Suita-shi, Osaka, 564-8680, Japan

d) Department of Chemistry and Biomolecular Science, Gifu University, 1-1 Yanagido, Gifu, 501-1193, Japan

e) Research Equipment Sharing Promotion Center, Organization for Research and Community Development, Gifu University, 1-1 Yanagido, Gifu, 501-1193, Japan

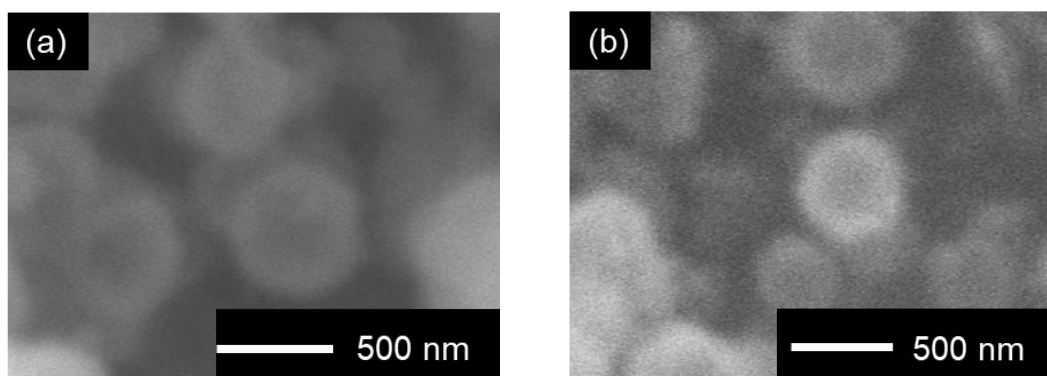

Fig. S1 SEM image of (a)Ga-Beta-150 and (b)Ga-Beta-200

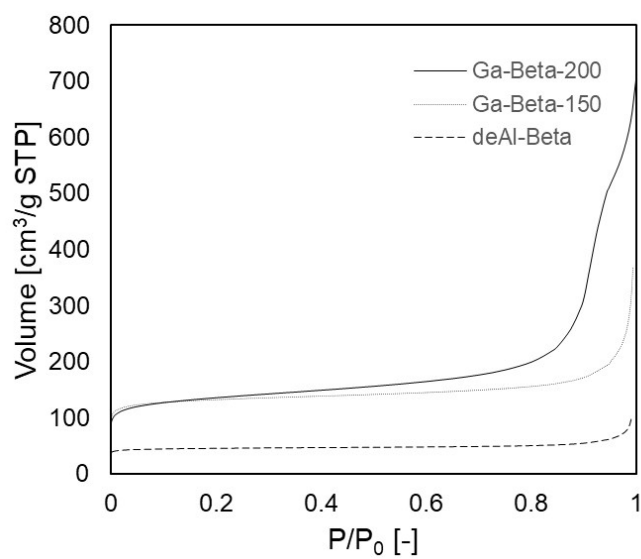

**Fig. S2 N<sub>2</sub> adsorption isotherms of Ga-Beta-200, Ga-Beta-150 and deAl-Beta**

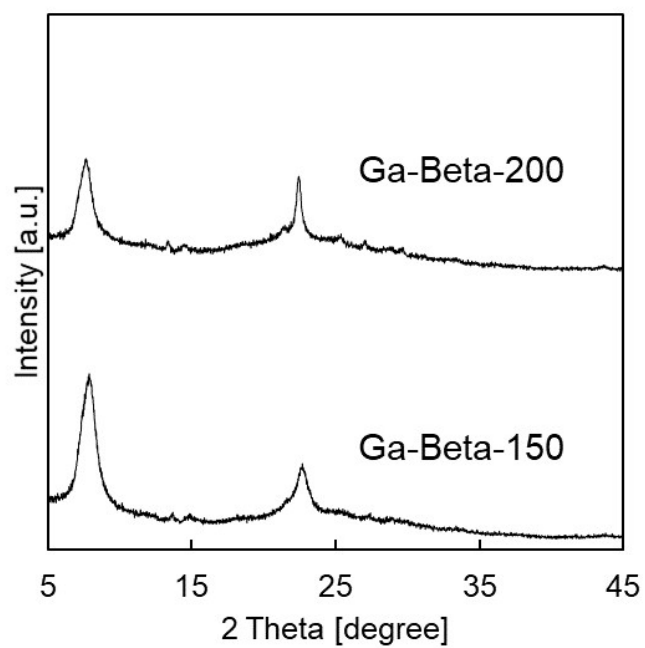

**Fig. S3 XRD patterns of Ga-Beta after PDH reaction**

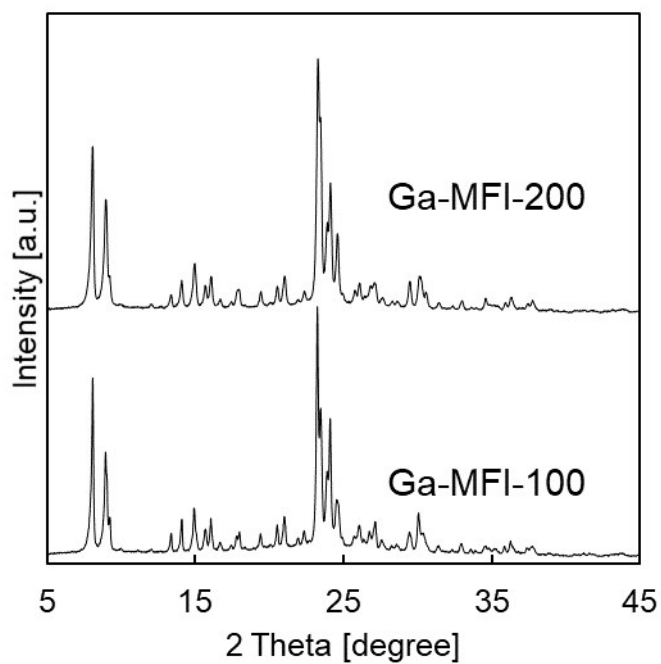

**Fig. S4 XRD patterns of Ga-MFI**

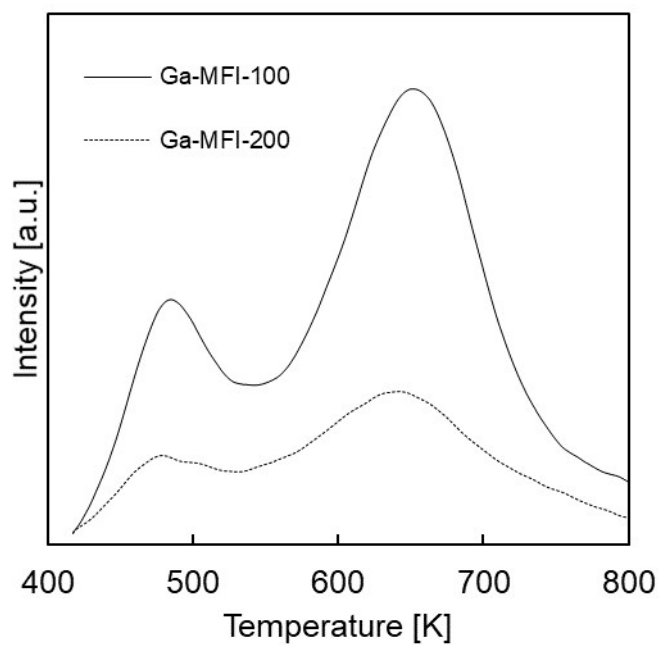

**Fig. S5 NH<sub>3</sub>-TPD profiles of Ga-MFI**
